# Supplementary material
Source: ML conference proceedings conference paper supplement (https://openaccess.thecvf.com/content/ICCV2021/html/Appalaraju_DocFormer_End-to-End_Transformer_ICCV_2021_paper.html)
Supplement: Supplementary file 1 [file Appalaraju_DocFormer_End-to-End_Transformer_ICCV_2021_supplemental.pdf]

# DocFormer Supplemental Paper

Srikar Appalaraju  
AWS AI

srikara@amazon.com

Bhavan Jasani  
AWS AI

bjasani@amazon.com

Bhargava Urala Kota  
AWS AI

bharkota@amazon.com

Yusheng Xie  
AWS AI

yushx@amazon.com

R. Manmatha  
AWS AI

manmatha@amazon.com

## 1. Supplemental

This is the supplemental material for the main DocFormer paper [1]. Please read the main paper for model formulation, performance numbers on various datasets and further analysis and ablation.

### 1.1. Implementation Details

We present all the hyper-parameters in Table 1 used for pre-training and fine-tuning DocFormer. We fine-tune on downstream tasks on the same number of epochs as prior art [9, 10, 5]: FUNSD [3], Kleister-NDA [2] datasets were fine-tuned for 100 epochs. CORD [7] for 200 epochs. RVL-CDIP [4] for 30 epochs. For Key, Query 1-D relative local attention we choose a span of 8 i.e. for a particular multi-modal feature, DocFormer gives more attention 8 tokens to its left and right.

| Hyper-Parameter        | Pre-training   | Fine-tuning |
|------------------------|----------------|-------------|
| Epochs                 | 5              | varies      |
| Learning rate          | 5E-05          | 2.5E-05     |
| Warm-up                | 10% iters      | 0           |
| Gradient Clipping      | 1.0            | 1.0         |
| Gradient agg.          | False          | False       |
| Optimizer              | AdamW[6]       | AdamW[6]    |
| Lower case             | True           | True        |
| Sequence length        | 512            | 512         |
| Encoder layers         | 12             | 12          |
| 32-bit mixed precision | True           | True        |
| Batch size             | 9 per GPU      | 4 per GPU   |
| GPU hardware           | A100 (40GB)    | V100 (16GB) |
| Training Num. Samples  | 5M             | varies      |
| Training time          | 17 hours/epoch | varies      |

Table 1: **Implementation Details:** Hyper-parameters used for pre-training DocFormer and fine-tuning for downstream tasks. Training epochs vary for down-stream tasks.

### 1.2. Run-time Complexity Analysis

Since we propose a variant of the self-attention [8] operation, we compute the train and inference run-time analysis

in big-o notation.

| Layer Type                | Run-time Complexity        | Seq. Complexity |
|---------------------------|----------------------------|-----------------|
| Convolution               | $O(k \cdot n \cdot d^2)$   | $O(1)$          |
| Recurrent                 | $O(n \cdot d^2)$           | $O(n)$          |
| Self-Attention            | $O(n^2 \cdot d)$           | $O(1)$          |
| Self-Attention (relative) | $O(r \cdot n \cdot d)$     | $O(1)$          |
| DocFormer MMSA            | $2 \cdot [O(n^2 \cdot d)]$ | $O(1)$          |

Table 2: **Complexity analysis:** Here  $n$  is the sequence length,  $d$  is the representation dimension,  $k$  is the kernel size of convolutions and  $r$  the size of the neighborhood in restricted self-attention. Omitting number of attention heads  $h$  for brevity. Here assume  $h = 1$ . In addition, MMSA: multi-modal self-attention.

Please note that the full run-time complexity for DocFormer has been abridged as the self-attention is the most significant operation (keeping in line with big-O notation). In addition, the presence of 2 is to signify the unique MMSA operation proposed in this paper, where multi-modal feature from each layer is added with image and spatial features (see Section 3.1). We see that DocFormer’s multi-modal self-attention (Section 3.1) is an efficient way to do multi-modal learning.

### 1.3. Pseudo-code

We present a rough pseudo-code for our novel multi-modal self-attention (MMSA) as described in section 3.1. We believe the pseudo-code would aid an independent researcher to better replicate our proposed novelty. Please note omitting dropout and layer norm at the end for brevity.

```
1 ##Multi Modal Self Attention
2
3 #text kv embeddings
4 key1 = Linear(d_model, n_head * d_k)
5 query1 = Linear(d_model, n_head * d_k)
6 value1 = Linear(d_model, n_head * d_v)
7
8 #image kv embeddings
9 key2 = Linear(d_model, n_head * d_k)
10 query2 = Linear(d_model, n_head * d_k)
11 value2 = Linear(d_model, n_head * d_v)
12
```

```

13 #spatial embeddings. note! shared by text, image
14 key3 = Linear(d_model, n_head * d_k)
15 query3 = Linear(d_model, n_head * d_k)
16
17 #See Eq. 6 and 7 in main paper for formulation
18 def multi_modal_self_attention(emb, img_feat,
    spatial_feat):
19
20     #self-attention of text (and prev. layers subseq.)
21     k1,q1,v1 = emb,emb,emb
22     k1 = rearr(key1(k1), 'b t (head k) -> head b t k')
23     q1 = rearr(query1(q1), 'b l (head k) -> head b l k')
24     v1 = rearr(value1(v1), 'b t (head v) -> head b t v')
25     attn1 = einsum('hblk,hbtk->hbtl', [q1,k1])/sqrt(q1.
        shape[-1])
26
27     #1D relative pos. (query, key)
28     #note rel_pos_embed1 is learnt relative pos emb. nxn
29     rel_pos_key1 = einsum('bhrd,lrd->bhlr', k1,
        rel_pos_embed1)
30     rel_pos_query1 = einsum('bhld,lrd->bhlr', q1,
        rel_pos_embed1)
31
32     #shared spatial - text/hidden features
33     sp_k1, sp_q1 = spatial_feat, spatial_feat
34     sp_k1=rearr(key3(sp_k1),'b t (head k) -> head b t k')
35     sp_q1=rearr(query3(sp_q1),'b l (head k)->head b l k')
36     text_only_spatial_scores = einsum('hblk,hbtk->hbtl', [
        sp_q1,sp_k1])/sqrt(sp_q1.shape[-1])
37
38     text_attn_scores = attn1 + rel_pos_key1 +
        rel_pos_query1 + text_only_spatial_scores
39
40     #-----
41     ##Self-attn of image (repeat of above for img feat)
42     k2,q2,v2 = img_feat,img_feat,img_feat
43     k2 = rearr(key2(k2), 'b t (head k) -> head b t k')
44     q2 = rearr(query2(q2), 'b l (head k) -> head b l k')
45     v2 = rearr(value2(v2), 'b t (head v) -> head b t v')
46     attn2 = einsum('hblk,hbtk->hbtl', [q2,k2])/sqrt(q2.
        shape[-1])
47
48     #1D relative pos. (query, key)
49     #note rel_pos_embed2 is learnt relative pos emb. nxn
50     rel_pos_key2 = einsum('bhrd,lrd->bhlr', k2,
        rel_pos_embed2)
51     rel_pos_query2 = einsum('bhld,lrd->bhlr', q2,
        rel_pos_embed2)
52
53     #shared spatial - img features
54     sp_k2, sp_q2 = spatial_feat, spatial_feat
55     sp_k2=rearr(key3(sp_k2),'b t (head k) -> head b t k')
56     sp_q2=rearr(query3(sp_q2),'b l (head k)->head b l k')
57     img_only_spatial_scores = einsum('hblk,hbtk->hbtl', [
        sp_q2,sp_k2])/sqrt(sp_q2.shape[-1])
58
59     img_attn_scores = attn2 + rel_pos_key2 +
        rel_pos_query2 + img_only_spatial_scores
60
61     #----- attended output: multi-modal
62     text_attn_probs = dropout(softmax(dim=-1)(
        text_attn_scores))
63     img_attn_probs = dropout(softmax(dim=-1)(
        img_attn_scores))
64
65     text_cntx = einsum('hbtl,hbtlv->hbtlv', [text_attn_probs
        , v1])
66     img_cntx = einsum('hbtl,hbtlv->hbtlv', [img_attn_probs,
        v2])
67     context = text_cntx + img_cntx
68     return context

```

## 1.4. DocFormer Architecture for Downstream Tasks

DocFormer is pre-trained as mentioned in section 3.2. After training it for 5 epochs, we remove the pre-training

multi-task heads and use DocFormer (including the visual branch) as a backbone. We simply add a trainable linear-head which predicts the appropriate number of classes which is dataset specific. Please see Figure 1 for architecture modifications for downstream tasks.

## 1.5. DocFormer Multi-Modal Self-Attention

In Figure 2 we show a more detailed visual representation of the novel multi-modal self-attention introduced in this paper. For reference we also show the original self-attention used by Vaswani et al. [8].

## 1.6. FUNSD Visualizations

DocFormer achieves state-of-the-art performance of 83.34% F1-score (see Section 4.1) on FUNSD [3] dataset amongst other multi-modal models its size. In this sub-section we look at more visualizations by DocFormer on the test-set. One important aspect of this VDU we would like to mention is the OCR is not in human reading-order.

Please note that, we search for and present cases where mistakes were made by DocFormer with the aim of understanding mistakes. Legend for the colors used in images is, Header-label: **Red**, Question: **Blue**, Answer: **Green**, Other: Grey color. Please see Figures 3, 4, 5.

In Figure 6, we show one specific pattern that DocFormer learns through its novel multi-modal self-attention. We show that DocFormer automatically learns repetitive local patterns even though it was not explicitly taught this.

## 1.7. CORD Visualizations

DocFormer matches the state-of-the-art performance of 96.33% F1-score on CORD [7] dataset (previous state-of-the-art model TILT-large consists of 780M parameters almost 4x the size of DocFormer). Please see Section 4.3 in the main paper.

In this sub-section we look at CORD [7] visualizations by DocFormer. We explicitly show hard-cases where DocFormer does well, see Figures 7, 8, 9, 10, 11. In order to be transparent, we also show an error scenario in Figure 12. Legend for the colors in images is, Menu items: **Red**, Total: **Blue**, Sub-total (pre-tax): **Green**, Void-menu: Cyan color, Other: grey.

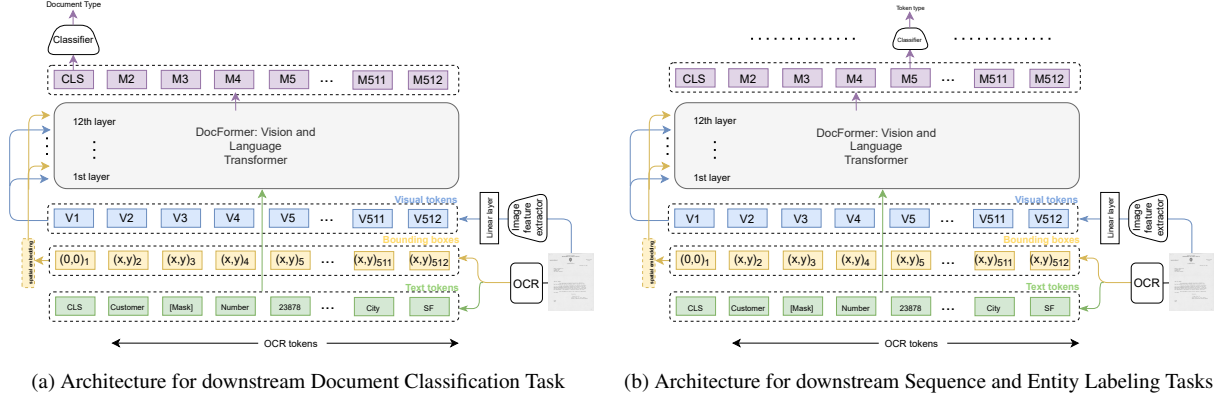

Figure 1: **DocFormer architecture for various downstream tasks:** Image on **Left** (a) is the architecture for document classification [CLS] is a pooling layer (fn  $\rightarrow$  ReLU  $\rightarrow$  fn) to get a pooled representation used for document classification task. Image on **Right** (b) is the architecture used for entity and sequence labeling tasks. Note, only a single linear layer is added for all downstream tasks. Also, all components of DocFormer are fine-tuned for each of the downstream tasks.

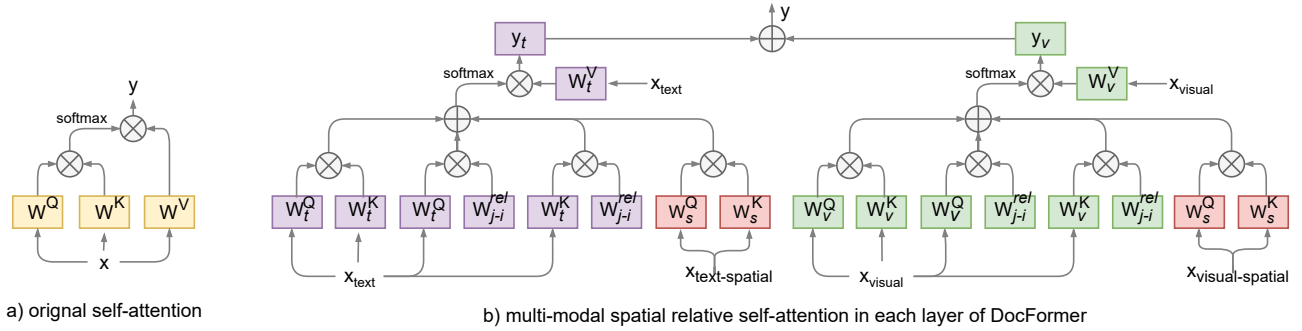

Figure 2: **Multi-Modal Self-Attention Layer:** the image **a) Left** shows the traditional self-attention proposed in Vaswani et al [8]. Note the multi-head attention and feed-forward layers are omitted for brevity. Cross (X) is matrix-multiplication and (+) is element-wise addition. **b) Right** shows the proposed multi-modal self-attention layer. This comprises each layer of DocFormer. Notice, the spatial weights across text, vision are shared (RED color), thus helping DocFormer address the *cross-modality feature correlation* issue commonly faced in multi-modal training. The notation is consistent with Equations 1-7 in the main paper. Best viewed in color.

| NEW COMPETITIVE PRODUCTS                                                                                                                                                                                                                                                                                                                                                                                                                                                     |                                                    | MLR   |
|------------------------------------------------------------------------------------------------------------------------------------------------------------------------------------------------------------------------------------------------------------------------------------------------------------------------------------------------------------------------------------------------------------------------------------------------------------------------------|----------------------------------------------------|-------|
| REPORTED BY:                                                                                                                                                                                                                                                                                                                                                                                                                                                                 | BOBBY MILLS, REGIONAL SALES MGR., INDIANAPOLIS, IN |       |
| DATE:                                                                                                                                                                                                                                                                                                                                                                                                                                                                        | 8/10/90                                            | TIME: |
| SOURCE OF INFORMATION:                                                                                                                                                                                                                                                                                                                                                                                                                                                       | HALL, ROBCAP, MOBILEVILLE, IN                      |       |
| MANUFACTURER:                                                                                                                                                                                                                                                                                                                                                                                                                                                                | H & W                                              |       |
| BRAND NAME:                                                                                                                                                                                                                                                                                                                                                                                                                                                                  | VICEROY KING BOX AND VICEROY LIGHTS KING BOX       |       |
| TYPE OF PRODUCT:                                                                                                                                                                                                                                                                                                                                                                                                                                                             |                                                    |       |
| SIZE OR SIZES:                                                                                                                                                                                                                                                                                                                                                                                                                                                               |                                                    |       |
| LIST PRICE:                                                                                                                                                                                                                                                                                                                                                                                                                                                                  |                                                    |       |
| EXTENT OF DISTRIBUTION:                                                                                                                                                                                                                                                                                                                                                                                                                                                      |                                                    |       |
| OTHER INFORMATION:                                                                                                                                                                                                                                                                                                                                                                                                                                                           | SEE ATTACHED INFORMATION SHEET                     |       |
| <div style="display: flex; justify-content: space-between;"> <div> <small>cc:</small><br/> A. H. Tisch<br/> R. H. Orouse<br/> M. A. Peterson<br/> T. H. Mau<br/> L. Gordon<br/> J. P. Mastandrea </div> <div> G. Telford<br/> F. J. Schultz<br/> A. W. Spears<br/> N. P. Ruffalo<br/> T. L. Achey<br/> P. J. McCann<br/> A. J. Giacolo </div> <div> J. J. Tesluk<br/> L. H. Kersh<br/> J. R. Slater<br/> S. T. Jones<br/> R. S. Goldsbrunner<br/> E. S. Harrow </div> </div> |                                                    |       |

(a) Ground Truth

| NEW COMPETITIVE PRODUCTS                                                                                                                                                                                                                                                                                                                                                                                                                                                     |                                                    | MLR   |
|------------------------------------------------------------------------------------------------------------------------------------------------------------------------------------------------------------------------------------------------------------------------------------------------------------------------------------------------------------------------------------------------------------------------------------------------------------------------------|----------------------------------------------------|-------|
| REPORTED BY:                                                                                                                                                                                                                                                                                                                                                                                                                                                                 | BOBBY MILLS, REGIONAL SALES MGR., INDIANAPOLIS, IN |       |
| DATE:                                                                                                                                                                                                                                                                                                                                                                                                                                                                        | 8/10/90                                            | TIME: |
| SOURCE OF INFORMATION:                                                                                                                                                                                                                                                                                                                                                                                                                                                       | HALL, ROBCAP, MOBILEVILLE, IN                      |       |
| MANUFACTURER:                                                                                                                                                                                                                                                                                                                                                                                                                                                                | H & W                                              |       |
| BRAND NAME:                                                                                                                                                                                                                                                                                                                                                                                                                                                                  | VICEROY KING BOX AND VICEROY LIGHTS KING BOX       |       |
| TYPE OF PRODUCT:                                                                                                                                                                                                                                                                                                                                                                                                                                                             |                                                    |       |
| SIZE OR SIZES:                                                                                                                                                                                                                                                                                                                                                                                                                                                               |                                                    |       |
| LIST PRICE:                                                                                                                                                                                                                                                                                                                                                                                                                                                                  |                                                    |       |
| EXTENT OF DISTRIBUTION:                                                                                                                                                                                                                                                                                                                                                                                                                                                      |                                                    |       |
| OTHER INFORMATION:                                                                                                                                                                                                                                                                                                                                                                                                                                                           | SEE ATTACHED INFORMATION SHEET                     |       |
| <div style="display: flex; justify-content: space-between;"> <div> <small>cc:</small><br/> A. H. Tisch<br/> R. H. Orouse<br/> M. A. Peterson<br/> T. H. Mau<br/> L. Gordon<br/> J. P. Mastandrea </div> <div> G. Telford<br/> F. J. Schultz<br/> A. W. Spears<br/> N. P. Ruffalo<br/> T. L. Achey<br/> P. J. McCann<br/> A. J. Giacolo </div> <div> J. J. Tesluk<br/> L. H. Kersh<br/> J. R. Slater<br/> S. T. Jones<br/> R. S. Goldsbrunner<br/> E. S. Harrow </div> </div> |                                                    |       |

(b) DocFormer predictions

Figure 3: **DocFormer perfect predictions for 82837252 testfile of FUNSD dataset:** Left image shows GT and right image is the prediction made by DocFormer which perfectly matches with GT. Best viewed in color.



**COMPETITIVE PRODUCT INTRODUCTION  
PROGRESS REPORT**

TO: Sam Zolot      MANUFACTURER: B&W  
FROM: D. J. Lando      BRAND: Kool Waterfall  
DATE: 2-Dec-97      TYPE OF PACKINGS: All Packings

REPORTING PERIODS: Oct      Nov ☒      Dec      Jan

TEST MARKET GEOGRAPHY: Divisions 621 and 622 (Kool Waterfall)

PRICE POINT: FULL \$      RV \$ (Indicate Distributor's Cost Per Carton)

**SALES FORCE INVOLVEMENT:**  
They have crew-worked distribution, and it is reported that they may crew-work it again. Sales force has been busy promoting old style packs to clean up inventory. All POS is being converted to "B" Kool.

**DISTRIBUTORS - ACCEPTANCE/INTRO TERMS/INTRO DEALS/INVOLVEMENT:**  
All accounts have the new packaging. It was not a problem obtaining new distributors. All accounts appear to have 100% distribution of new packages.

**CHAINS - ACCEPTANCE/MERCHANDISING:**  
This has not been a problem. New packaging is just following up on the old "packaging".

**INDEPENDENTS - ACCEPTANCE/MERCHANDISING:**  
Very well received. The old packs are being consolidated and promoted in select retail locations at 40% off \$4.00 off cartons.

**ADVERTISING - EFFECTIVENESS OF P.O.S.:**  
The theme "B" Kool has replaced all previous POS. They have effectively replaced all old POS. New door signage, hour signs, poster mats, and clocks have the new design. "B" Kool also appears on billboards in Illinois.

PAGE 1 OF 2

(a) Ground Truth

**COMPETITIVE PRODUCT INTRODUCTION  
PROGRESS REPORT**

TO: Sam Zolot      MANUFACTURER: B&W  
FROM: D. J. Lando      BRAND: Kool Waterfall  
DATE: 2-Dec-97      TYPE OF PACKINGS: All Packings

REPORTING PERIODS: Oct      Nov ☒      Dec      Jan

TEST MARKET GEOGRAPHY: Divisions 621 and 622 (Kool Waterfall)

PRICE POINT: FULL \$      RV \$ (Indicate Distributor's Cost Per Carton)

**SALES FORCE INVOLVEMENT:**  
They have crew-worked distribution, and it is reported that they may crew-work it again. Sales force has been busy promoting old style packs to clean up inventory. All POS is being converted to "B" Kool.

**DISTRIBUTORS - ACCEPTANCE/INTRO TERMS/INTRO DEALS/INVOLVEMENT:**  
All accounts have the new packaging. It was not a problem obtaining new distributors. All accounts appear to have 100% distribution of new packages.

**CHAINS - ACCEPTANCE/MERCHANDISING:**  
This has not been a problem. New packaging is just following up on the old "packaging".

**INDEPENDENTS - ACCEPTANCE/MERCHANDISING:**  
Very well received. The old packs are being consolidated and promoted in select retail locations at 40% off \$4.00 off cartons.

**ADVERTISING - EFFECTIVENESS OF P.O.S.:**  
The theme "B" Kool has replaced all previous POS. They have effectively replaced all old POS. New door signage, hour signs, poster mats, and clocks have the new design. "B" Kool also appears on billboards in Illinois.

PAGE 1 OF 2

(b) DocFormer predictions

Figure 4: **DocFormer slightly bad predictions for 82250337\_0338 testfile on FUNSD dataset:** Based on the predictions on the right (b), we can see that DocFormer was able to classify most of the sequence correctly. However, if we look at the orange bounding boxes we can spot the errors. "(Indicate Distributor's Cost per Carton)" is tagged as Other text in ground-truth but DocFormer incorrectly classified part of the tokens as **Question**. Best if viewed digitally and in color.

**STOUT INDUSTRIES, INC.**  
5425 W. FLORISSANT AVE., ST. LOUIS, MO 63136 • (314) 385-2290

10675

**PROPOSAL**

TO: Lorillard Corporation  
ADDRESS: 666 Fifth Avenue  
CITY: New York  
STATE: New York 10103  
DATE: October 16, 1987  
FOR: Metal "Pack" Plaque  
Mr. A. D. Steinberg  
Attn: Mr. Robert Kennedy

It is our pleasure to propose the following:

ITEM: Harley Davidson Metal Plaque SIZE: 17" x 23"  
MATERIAL: STEEL ALUMINUM 1/2 GAUGE .025"  
COLORS: Transparent gold, opaque black, white and orange  
BASE COLOR: Aluminum SINGLE FACE X DOUBLE FACE  
HOLES: YES X NO NUMBER OF 4  
CORNERS: ROUND SQUARE X ANGLE CUT TO SHAPE  
EDGES: HEMMED CURLED EMBOSSED X BEADED BORDER  
STAMP FRAME X RIGHT ANGLE BEND BACK FRAME  
PACKING: PER CARTON 10 PER CRATE PER BUNDLE  
OTHER: Price is based on reproduction of customer supplied "Pack" box.  
Tooling: Form die, brass emboss die to achieve detail on eagle.

QUANTITIES: 500 Plaques One time tooling @ \$3,015.00  
PRICE: \$9.18 each Steel tips \$1,045.00

BILLING: X BILL AS MANUFACTURE BILL AS SHIP FOR 6 MOS 12 MOS  
WAREHOUSING: X SHIP IMMEDIATELY 6 MOS: WHSR 12 MOS: WHSR  
DROPP SHIPPING: PER SHIPMENT

87528380

TERMS: NET 10 DAYS  
A service charge of 1 1/2% per month will be applied to all unpaid balances over 30 days.

**STOUT INDUSTRIES, INC.**

(a) Ground Truth

**STOUT INDUSTRIES, INC.**  
5425 W. FLORISSANT AVE., ST. LOUIS, MO 63136 • (314) 385-2290

10675

**PROPOSAL**

TO: Lorillard Corporation  
ADDRESS: 666 Fifth Avenue  
CITY: New York  
STATE: New York 10103  
DATE: October 16, 1987  
FOR: Metal "Pack" Plaque  
Mr. A. D. Steinberg  
Attn: Mr. Robert Kennedy

It is our pleasure to propose the following:

ITEM: Harley Davidson Metal Plaque SIZE: 17" x 23"  
MATERIAL: STEEL ALUMINUM 1/2 GAUGE .025"  
COLORS: Transparent gold, opaque black, white and orange  
BASE COLOR: Aluminum SINGLE FACE X DOUBLE FACE  
HOLES: YES X NO NUMBER OF 4  
CORNERS: ROUND SQUARE X ANGLE CUT TO SHAPE  
EDGES: HEMMED CURLED EMBOSSED X BEADED BORDER  
STAMP FRAME X RIGHT ANGLE BEND BACK FRAME  
PACKING: PER CARTON 10 PER CRATE PER BUNDLE  
OTHER: Price is based on reproduction of customer supplied "Pack" box.  
Tooling: Form die, brass emboss die to achieve detail on eagle.

QUANTITIES: 500 Plaques One time tooling @ \$3,015.00  
PRICE: \$9.18 each Steel tips \$1,045.00

BILLING: X BILL AS MANUFACTURE BILL AS SHIP FOR 6 MOS 12 MOS  
WAREHOUSING: X SHIP IMMEDIATELY 6 MOS: WHSR 12 MOS: WHSR  
DROPP SHIPPING: PER SHIPMENT

87528380

TERMS: NET 10 DAYS  
A service charge of 1 1/2% per month will be applied to all unpaid balances over 30 days.

**STOUT INDUSTRIES, INC.**

(b) DocFormer predictions

Figure 5: **DocFormer slightly bad predictions for 87528380 testfile on FUNSD dataset:** Here, we focus the readers attention on two specific scenarios: FUNSD dataset has been known to have ground-truth annotation issues. We find on the left image the orange highlighted box "8650" is incorrectly annotated in GT as "other" text, however DocFormer correctly predicts it as "answer" token for the question "total". **Scenario 2:** The orange highlighted boxes on the right image are tokens which are actually sub-headers but DocFormer misclassifies as "question" tokens. In this case, DocFormer likely gave more weight-age to language features and not so much to visual features and so ended up mis-classifying. We would like to point out that this is an ambiguous example as the language in mis-classified regions do look like "questions". Best viewed in color.

08/17/87 18:55 000 001 1000 LORTLAND FIELD 0001

TO: N: AL Sparrow

FROM: T: DC Hachy MAY 19 AM 11

SUBJECT: OLD GOLD MENTHOL LIGHTS & ULTRA LIGHTS 100'S - PROGRESS REPORT

REGION:

ONLY IF PARTIAL REGION CONTINUE WITH DIVISION SCOPE

DIVISION:

|                    |            |                         |           |
|--------------------|------------|-------------------------|-----------|
| DIVISION: Portland | # REPS: 5  | DIVISION: SEASIDE SOUTH | # REPS: 2 |
| DIVISION: Seaside  | # REPS: 25 | DIVISION: Seaside North | # REPS: 5 |
| DIVISION: Seaside  | # REPS: 5  | DIVISION: Hanna         | # REPS: 5 |

DIRECT ACCOUNTS AND CHAINS HEADQUARTERED WITHIN THE REGION  
(15 # STORES) STOCKING NO OLD GOLD MENTHOL LIGHTS OR ULTRA LIGHTS 100'S

| NAME OF ACCOUNT  | INDENT<br>AMOUNT | DATE OF<br>ORDER | NAVSAT RECORD | INDENT<br>VOLUME | DATE OF<br>ORDER |
|------------------|------------------|------------------|---------------|------------------|------------------|
| Texas - Seattle  | 105 / 5          | 225              |               |                  |                  |
| Texas - Portland | 81 / 5           | 27               |               |                  |                  |
| Maple Grove      | 20 / 2           | 15               |               |                  |                  |
| Don't Move       | 125 / 5          | 31               |               |                  |                  |
| Big Trip         | 106 / 14         | 18               |               |                  |                  |
| Alameda          | 77 / 5           | 19               |               |                  |                  |
| Acme Gas         | 800 / 72         | 20               |               |                  |                  |

82200067

Page 1 of 3 Pages

(a) Example FUNSD document with Ground Truth overlays

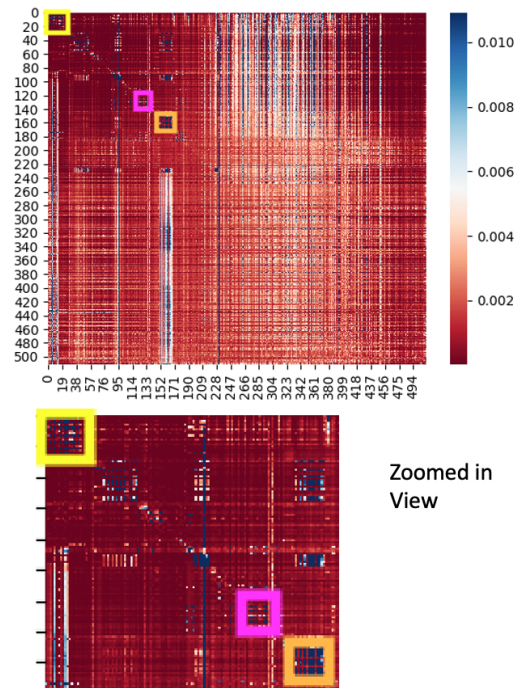

(b) DocFormer prediction self-attention heatmap (last encoder layer, 2nd head). DocFormer has up to 512 tokens in each layer. Each point on the image shows the strength of attention from a token on the  $y$ -axis to a token on the  $x$ -axis. The blue colors show more attention and the red less attention.

Figure 6: **DocFormer learns repetition and regularity**: the yellow and purple boxes in the left figure matches the yellow and purple boxes in the right figure. The OCR is not in reading order. Hence the six occurrences of “DIVISION” appear together in front (among the top 25) - yellow box in Figure b) and they correspond to the yellow boxes in Figure a). Similarly, the purple box in Figure b) corresponds to the purple boxes in Figure a). DocFormer is able to pick up such repetitions as strong self-attention signals (blue colored pixels in the right self-attention figure) that help the model solve the task. This example shows that regular indentation and spacing help DocFormer understand the form better just as they would help humans parse a form. The orange boxed region in the heatmap also shows strong self-attention. We think that is due to DocFormer representing the blob of text as a single paragraph (in this case, as background text). Best viewed digitally and in color.

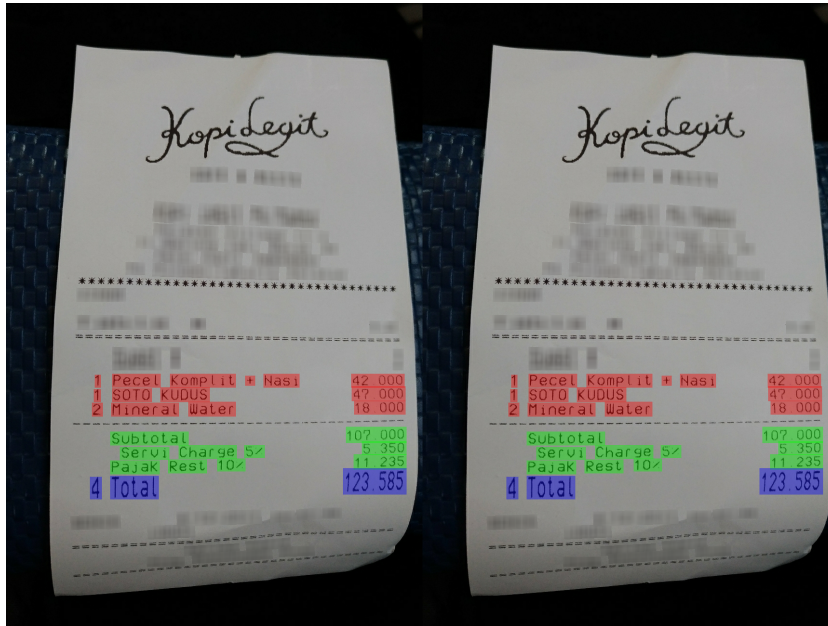

(a) Ground Truth (left) and DocFormer predictions (right)

Figure 7: **DocFormer predictions on CORD**: For file receipt\_00053 (a) shows both ground-truth and predictions. DocFormer predicted correctly all the entity regions in the image. Best if viewed digitally and in color.

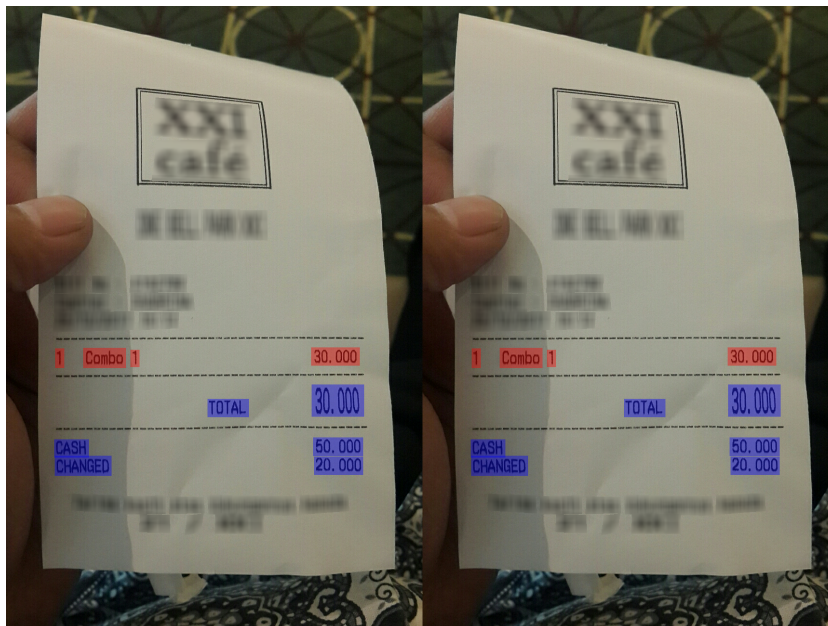

(a) Ground Truth (left) and DocFormer predictions (right)

Figure 8: **DocFormer predictions on CORD**: For file receipt\_00044. Best if viewed digitally and in color.



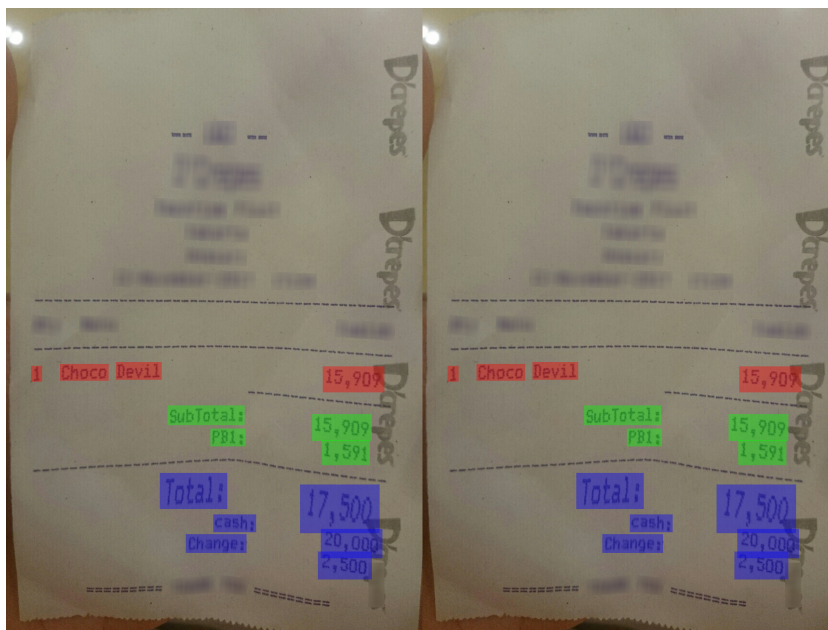

(a) Ground Truth (left) and DocFormer predictions (right)

Figure 9: **DocFormer predictions on CORD**: For file receipt\_00072. Best if viewed digitally and in color.

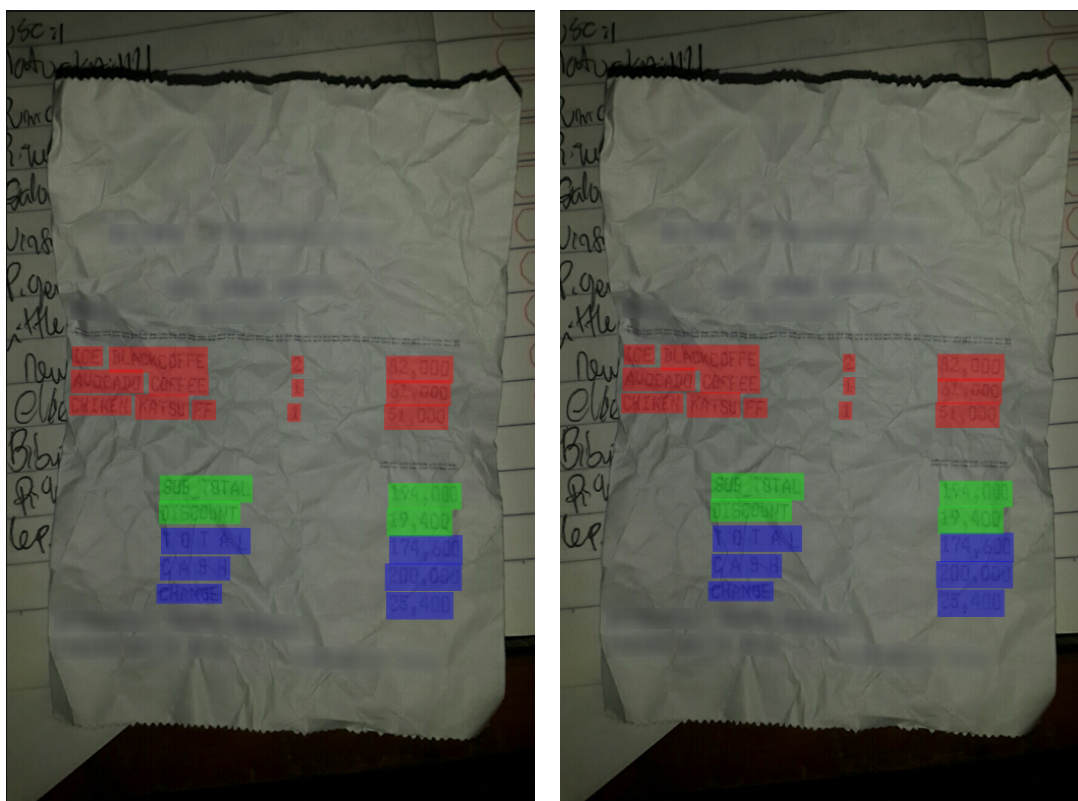

(a) Ground Truth

(b) DocFormer predictions

Figure 10: **DocFormer perfect predictions on CORD dataset**: Left image shows GT and right image is the prediction for file receipt\_00004 made by DocFormer which perfectly matches with the GT despite the presence of distortion and background text.

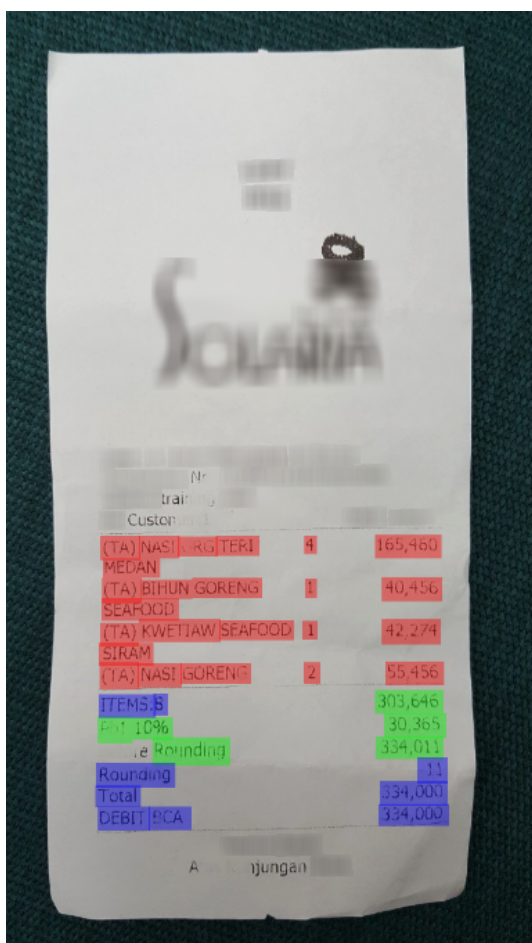

(a) Ground Truth

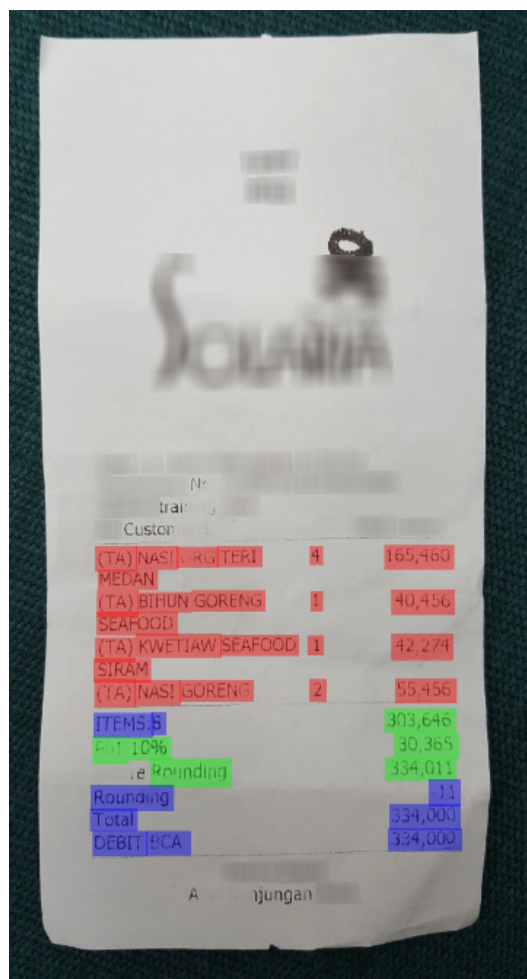

(b) DocFormer predictions

Figure 11: **DocFormer perfect predictions on CORD dataset:** Left image shows GT and right image is the prediction for file receipt\_00051 made by DocFormer which perfectly matches with GT. Note that the faded out text which is hard to OCR is correctly classified due to multi-modal self-attention features.

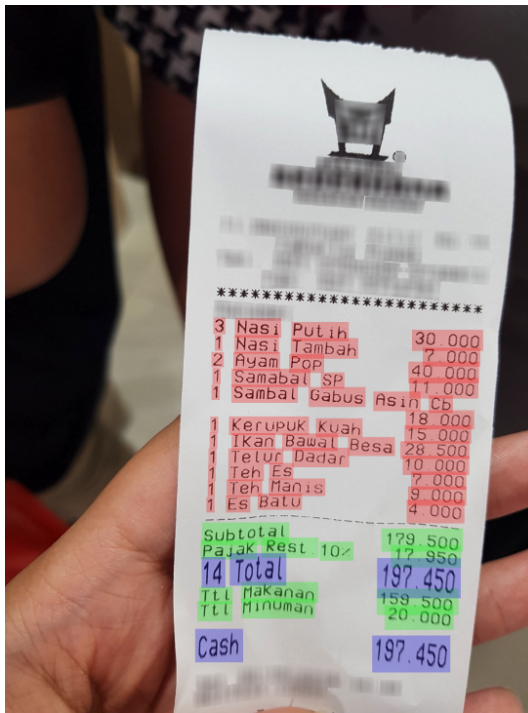

(a) Ground Truth

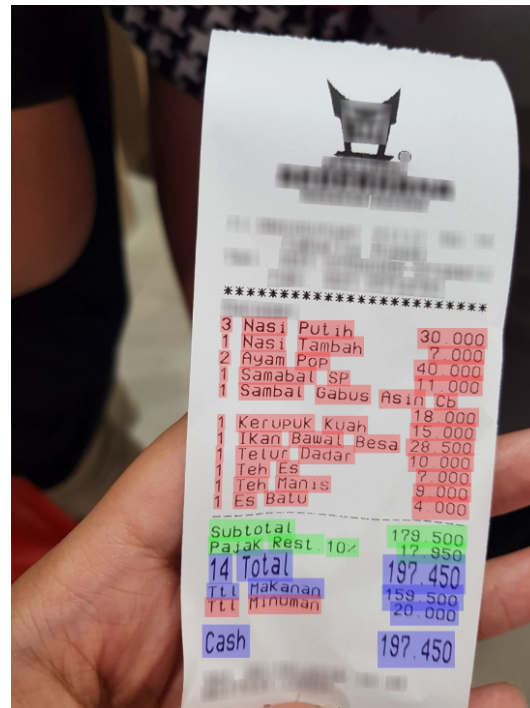

(b) DocFormer predictions

Figure 12: **DocFormer Partially correct predictions on CORD dataset:** Left image shows GT and right image is the prediction for file receipt\_00085 made by DocFormer with a misclassification of tokens of category SUBTOTAL with TOTAL items. This could be due to the rarity of SUBTOTAL tokens appearing below TOTAL tokens which DocFormer may not have encountered during training.

## References

- [1] Srikar Appalaraju, Bhavan Jasani, Bhargava Urala Kota, Yusheng Xie, and R Manmatha. Docformer: End-to-end transformer for document understanding. *arXiv preprint arXiv:2106.11539*, 2021.
- [2] Filip Galiński, Tomasz Stanisławek, Anna Wróblewska, Dawid Lipiński, Agnieszka Kaliska, Paulina Rosalska, Bartosz Topolski, and Przemysław Biecek. Kleister: A novel task for information extraction involving long documents with complex layout. *arXiv preprint arXiv:2003.02356*, 2020.
- [3] Jean-Philippe Thiran Guillaume Jaume, Hazim Kemal Ekenel. Funsd: A dataset for form understanding in noisy scanned documents. In *Accepted to ICDAR-OST*, 2019.
- [4] Adam W Harley, Alex Ufkes, and Konstantinos G Derpanis. Evaluation of deep convolutional nets for document image classification and retrieval. In *International Conference on Document Analysis and Recognition (ICDAR)*.
- [5] Teakgyu Hong, DongHyun Kim, Mingi Ji, Won-seok Hwang, Daehyun Nam, and Sungrae Park. Bros: A pre-trained language model for understanding texts in document. *under review <https://openreview.net/references/pdf?id=uCz3OR6CJT>*, 2020.
- [6] Ilya Loshchilov and Frank Hutter. Decoupled weight decay regularization. *arXiv preprint arXiv:1711.05101*, 2017.
- [7] Park Seunghyun, Shin Seung, Lee Bado, Lee Junyeop, Surh Jaeheung, Seo Minjoon, and Lee Hwalsuk. Cord: A consolidated receipt dataset for post-ocr parsing. 2019.
- [8] Ashish Vaswani, Noam Shazeer, Niki Parmar, Jakob Uszkoreit, Llion Jones, Aidan N Gomez, Lukasz Kaiser, and Illia Polosukhin. Attention is all you need. *arXiv preprint arXiv:1706.03762*, 2017.
- [9] Yiheng Xu, Minghao Li, Lei Cui, Shaohan Huang, Furu Wei, and Ming Zhou. Layoutlm: Pre-training of text and layout for document image understanding. In *Proceedings of the 26th ACM SIGKDD International Conference on Knowledge Discovery & Data Mining*, pages 1192–1200, 2020.
- [10] Yang Xu, Yiheng Xu, Tengchao Lv, Lei Cui, Furu Wei, Guoxin Wang, Yijuan Lu, Dinei Florencio, Cha Zhang, Wanxiang Che, et al. Layoutlmv2: Multi-modal pre-training for visually-rich document understanding. *arXiv preprint arXiv:2012.14740*, 2020.
